# Supplementary material
Source: PubMed Central journal article supplement (PMC1948930)
Supplement: pnas_0702729104_2.pdf [file pnas_0702729104_2.pdf]

Table 1: Transcripts modified on addition of LLO

| Probe names  | Gene name                                                                  | Fold change |
|--------------|----------------------------------------------------------------------------|-------------|
| 1554036_at   | Zinc finger and BTB domain containing 24                                   | -3.22*      |
| 213747_at    | Antizyme inhibitor 1                                                       | -2.92*      |
| 1569856_at   | Tripeptidyl peptidase II                                                   | -2.56       |
| 209774_x_at  | Chemokine (C-X-C motif) ligand 2                                           | -2.49*      |
| 241617_x_at  | Unknown                                                                    | -2.42       |
| 228697_at    | Histidine triad nucleotide binding protein 3                               | -2.26       |
| 204270_at    | Unknown                                                                    | -2.17       |
| 226014_at    | Eukaryotic translation initiation factor 3, subunit 5 $\epsilon$ , 47kDa   | -2.14       |
| 210335_at    | Peptidylglycine $\alpha$ -amidating monooxygenase COOH-terminal interactor | -2.11       |
| 220272_at    | Basonuclin 2                                                               | -2.04*      |
| 230102_at    | Ets variant gene 5 (ets-related molecule)                                  | -2.01       |
| 222614_at    | Chromosome 21 open reading frame 6                                         | -2.01       |
| 213481_at    | S100 calcium binding protein A13                                           | -2.00       |
| 204015_s_at  | Dual specificity phosphatase 4                                             | -1.98*      |
| 239942_at    | Unknown                                                                    | -1.94       |
| 221848_at    | ADP-ribosylation factor related protein 1                                  | -1.93       |
| 228673_s_at  | Echinoderm microtubule associated protein like 4                           | -1.93       |
| 202912_at    | Adrenomedullin                                                             | -1.91       |
| 229450_at    | Interferon-induced protein with tetratricopeptide repeats 3                | -1.88       |
| 238945_at    | Unknown                                                                    | -1.88       |
| 227404_s_at  | Early growth response 1                                                    | -1.88       |
| 226034_at    | Unknown                                                                    | -1.86       |
| 1557921_s_at | Unknown                                                                    | -1.83       |
| 209101_at    | Connective tissue growth factor                                            | -1.82       |

|              |                                                                                     |       |
|--------------|-------------------------------------------------------------------------------------|-------|
| 228251_at    | UBX domain containing 1                                                             | -1.81 |
| 219174_at    | Coiled-coil domain containing 2                                                     | -1.80 |
| 224443_at    | Unknown                                                                             | -1.79 |
| 201631_s_at  | Immediate early response 3                                                          | -1.78 |
| 230910_s_at  | Lymphocyte antigen 6 complex, locus K                                               | -1.73 |
| 1557458_s_at | SHB (Src homology 2 domain containing) adaptor protein B                            | -1.73 |
| 221704_s_at  | Vacuolar protein sorting 37 homolog B ( <i>S. cerevisiae</i> )                      | -1.73 |
| 210592_s_at  | Spermidine/spermine N1-acetyltransferase                                            | -1.73 |
| 1552701_a_at | Caspase-1 dominant-negative inhibitor pseudo-ICE                                    | -1.73 |
| 1555989_at   | Dishevelled associated activator of morphogenesis 1                                 | -1.70 |
| 227452_at    | Unknown                                                                             | -1.69 |
| 205005_s_at  | N-myristoyltransferase 2                                                            | -1.64 |
| 1553220_at   | Amyotrophic lateral sclerosis 2 (juvenile) chromosome region, candidate 13          | -1.63 |
| 219801_at    | Zinc finger protein 34 (KOX 32)                                                     | -1.62 |
| 235654_at    | Unknown                                                                             | -1.57 |
| 1554376_s_at | Protein tyrosine phosphatase-like (proline instead of catalytic arginine), member a | -1.57 |
| 210233_at    | Interleukin 1 receptor accessory protein                                            | -1.56 |
| 57540_at     | Ribokinase                                                                          | -1.56 |
| 210538_s_at  | Baculoviral IAP repeat-containing 3                                                 | -1.56 |
| 219832_s_at  | Homeo box C13                                                                       | -1.55 |
| 239257_at    | Mov10l1, Moloney leukemia virus 10-like 1, homolog (mouse)                          | -1.53 |
| 231200_at    | Family with sequence similarity 61, member B                                        | -1.51 |
| 218623_at    | HMP19 protein                                                                       | -1.51 |
| 227652_at    | Family with sequence similarity 69, member B                                        | -1.51 |
| 1557809_a_at | Polymerase (DNA directed), $\alpha$                                                 | 1.51  |
| 1563273_at   | Unknown                                                                             | 1.51  |
| 229949_at    | DKFZp434A0131 protein                                                               | 1.51  |

|              |                                                                                |      |
|--------------|--------------------------------------------------------------------------------|------|
| 236310_at    | Zinc finger protein 37b (KOX 21)                                               | 1.52 |
| 1555823_at   | Unknown                                                                        | 1.52 |
| 244200_at    | Yippee-like 2 ( <i>Drosophila</i> )                                            | 1.52 |
| 240105_at    | Chromosome 21 open reading frame 66                                            | 1.53 |
| 2-11934_x_at | Glucosidase, $\alpha$ neutral AB                                               | 1.54 |
| 243712_at    | X (inactive)-specific transcript                                               | 1.54 |
| 1556035_s_at | Zinc finger protein 207                                                        | 1.55 |
| 210337_s_at  | ATP citrate lyase                                                              | 1.56 |
| 215529_x_at  | Chromosome 21 open reading frame 106                                           | 1.56 |
| 214070_s_at  | ATPase, class V, type 10B                                                      | 1.56 |
| 200606_at    | Desmoplakin                                                                    | 1.57 |
| 201031_s_at  | Heterogeneous nuclear ribonucleoprotein H1 (H)                                 | 1.57 |
| 226675_s_at  | Metastasis associated lung adenocarcinoma transcript 1 (noncoding RNA)         | 1.57 |
| 239735_at    | Unknown                                                                        | 1.58 |
| 238363_at    | Catalase                                                                       | 1.59 |
| 237475_x_at  | Selenoprotein P, plasma, 1                                                     | 1.59 |
| 1561973_at   | SWI/SNF related, actin-dependent regulator of chromatin, subfamily c, member 2 | 1.59 |
| 1562226_at   | Unknown                                                                        | 1.59 |
| 220479_at    | Unknown                                                                        | 1.60 |
| 205110_s_at  | Fibroblast growth factor 13                                                    | 1.60 |
| 207365_x_at  | Ubiquitin specific protease 34                                                 | 1.61 |
| 1565717_s_at | Fusion (involved in t(1216) in malignant liposarcoma)                          | 1.62 |
| 227488_at    | Unknown                                                                        | 1.62 |
| 227062_at    | Trophoblast-derived noncoding RNA                                              | 1.62 |
| 230270_at    | PRP38 pre-mRNA processing factor 38 (yeast) domain containing B                | 1.63 |
| 239564_at    | Chromosome 21 open reading frame 45                                            | 1.64 |
| 234091_at    | MORC family CW-type zinc finger 2                                              | 1.64 |

|              |                                                                                |      |
|--------------|--------------------------------------------------------------------------------|------|
| 1554411_at   | Catenin (cadherin-associated protein), $\beta$ 1, 88 kDa                       | 1.64 |
| 232266_x_at  | Cell division cycle 2-like 5 (cholinesterase-related cell division controller) | 1.65 |
| 239999_at    | Chromosome 21 open reading frame 34                                            | 1.66 |
| 238449_at    | Unknown                                                                        | 1.66 |
| 235868_at    | Meningioma expressed antigen 5 (hyaluronidase)                                 | 1.66 |
| 1559578_at   | Coatmer protein complex, subunit $\zeta$ 2                                     | 1.67 |
| 229773_at    | Synaptosomal-associated protein, 23 kDa                                        | 1.67 |
| 1556007_s_at | Casein kinase 1, alpha 1                                                       | 1.68 |
| 217564_s_at  | Carbamoyl-phosphate synthetase 1, mitochondrial                                | 1.69 |
| 220796_x_at  | Solute carrier family 35, member E1                                            | 1.69 |
| 1555970_at   | F-box protein 28                                                               | 1.70 |
| 208694_at    | Protein kinase, DNA-activated, catalytic polypeptide                           | 1.71 |
| 1559038_at   | Septin 2                                                                       | 1.71 |
| 216225_at    | Anthrax toxin receptor 1                                                       | 1.74 |
| 225239_at    | Unknown                                                                        | 1.75 |
| 214657_s_at  | Trophoblast-derived noncoding RNA                                              | 1.75 |
| 237746_at    | Splicing factor, arginine/serine-rich 11                                       | 1.76 |
| 234563_at    | Phosphodiesterase 3A, cGMP-inhibited                                           | 1.76 |
| 1557944_s_at | Catenin (cadherin-associated protein), $\delta$ 1                              | 1.77 |
| 200769_s_at  | Methionine adenosyltransferase II, $\alpha$                                    | 1.78 |
| 243796_at    | Hexamethylene bis-acetamide inducible 2                                        | 1.79 |
| 224565_at    | Trophoblast-derived noncoding RNA                                              | 1.80 |
| 242191_at    | Neuroblastoma breakpoint family                                                | 1.80 |
| 231106_at    | Unknown                                                                        | 1.80 |
| 232889_at    | Unknown                                                                        | 1.81 |
| 224875_at    | Unknown                                                                        | 1.81 |
| 239022_at    | Succinate dehydrogenase complex, subunit A, flavoprotein-like 1                | 1.81 |

|             |                                                                                |        |
|-------------|--------------------------------------------------------------------------------|--------|
| 242608_x_at | Zinc finger protein 410                                                        | 1.82   |
| 211708_s_at | Stearoyl-CoA desaturase ( $\delta$ -9-desaturase)                              | 1.82   |
| 207464_at   | S-adenosylhomocysteine hydrolase-like 1                                        | 1.82   |
| 241413_at   | Ring finger protein 111                                                        | 1.83   |
| 240221_at   | Casein kinase 1, $\alpha$ 1                                                    | 1.83   |
| 220777_at   | Kinesin family member 13A                                                      | 1.83   |
| 207730_x_at | KIAA1881                                                                       | 1.84   |
| 228643_at   | Unknown                                                                        | 1.85   |
| 236610_at   | Phosphodiesterase 4D (phosphodiesterase E3 duncce homolog, <i>Drosophila</i> ) | 1.85   |
| 237215_s_at | Transferrin receptor (p90, CD71)                                               | 1.88   |
| 216636_at   | Unknown                                                                        | 1.89   |
| 239243_at   | Zinc finger protein 638                                                        | 1.89   |
| 234989_at   | Trophoblast-derived noncoding RNA                                              | 1.90   |
| 230256_at   | Unknown                                                                        | 1.90   |
| 231879_at   | Collagen, type XII, 1 $\alpha$                                                 | 1.90   |
| 1552621_at  | DNA directed RNA polymerase II polypeptide J-related gene                      | 1.92   |
| 1560386_at  | Exportin 1 (CRM1 homolog, yeast)                                               | 1.94   |
| 229574_at   | Transformer-2 $\alpha$                                                         | 1.95   |
| 234032_at   | Zinc finger, CCHC domain containing 7                                          | 1.96   |
| 223940_x_at | Metastasis associated lung adenocarcinoma transcript 1 (noncoding RNA)         | 1.96   |
| 1555878_at  | Ribosomal protein S24                                                          | 1.98   |
| 238593_at   | Unknown                                                                        | 1.98   |
| 203626_s_at | S-phase kinase-associated protein 2 (p45)                                      | 1.99** |
| 216971_s_at | Plectin 1, intermediate filament binding protein 500 kDa                       | 1.99   |
| 233073_at   | Cysteine-rich motor neuron 1                                                   | 2.03   |
| 210543_s_at | Protein kinase, DNA-activated, catalytic polypeptide                           | 2.03** |
| 242059_at   | Ethanolamine kinase 1                                                          | 2.04   |

|              |                                                                                               |      |
|--------------|-----------------------------------------------------------------------------------------------|------|
| 242482_at    | Protein kinase, cAMP-dependent, regulatory, type I, $\alpha$ (tissue specific extinguisher 1) | 2.04 |
| 243319_at    | Mediator of RNA polymerase II transcription, subunit 31 homolog (yeast)                       | 2.06 |
| 224566_at    | Trophoblast-derived noncoding RNA                                                             | 2.07 |
| 224568_x_at  | Metastasis associated lung adenocarcinoma transcript 1 (noncoding RNA)                        | 2.07 |
| 221919_at    | Heterogeneous nuclear ribonucleoprotein A1                                                    | 2.11 |
| 220458_at    | Unknown                                                                                       | 2.12 |
| 1558695_at   | Pleckstrin homology domain containing, family A member 5                                      | 2.12 |
| 220467_at    | Unknown                                                                                       | 2.17 |
| 1555996_s_at | Eukaryotic translation initiation factor 4A, isoform 2                                        | 2.17 |
| 1555858_at   | Unknown                                                                                       | 2.18 |
| 1554948_at   | Chromosome 22 open reading frame 1                                                            | 2.19 |
| 209006_s_at  | Chromosome 1 open reading frame 63                                                            | 2.20 |
| 242870_at    | Family with sequence similarity 80, member B                                                  | 2.20 |
| 242471_at    | Similar to SLIT-ROBO Rho GTPase-activating protein 2 (Formin-binding protein 2)               | 2.22 |
| 213517_at    | Poly(rC) binding protein 2                                                                    | 2.44 |
| 238320_at    | Trophoblast-derived noncoding RNA                                                             | 3.45 |

\* Indicates genes whose fold change in transcription as observed through microarray analysis was confirmed using quantitative RT-PCR.
