# Supplementary material
Source: PubMed Central journal article supplement (PMC1948930)

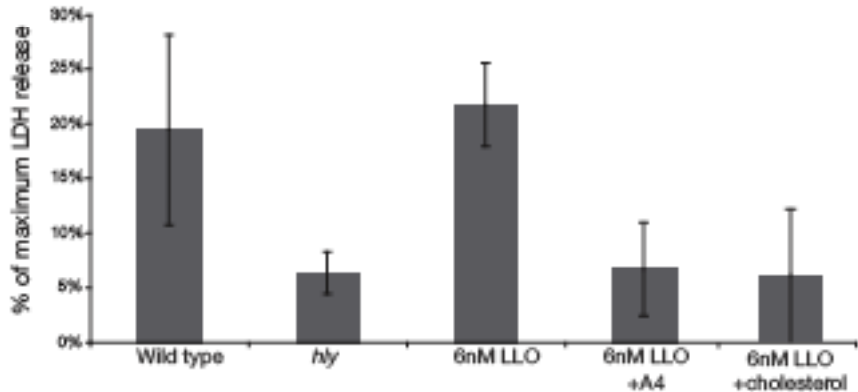

Supplement: pnas_0702729104_1.pdf [file pnas_0702729104_1.pdf]
